# Supplementary material for: Genome-Wide Association Study Identifies HLA-DP as a Susceptibility Gene for Pediatric Asthma in Asian Populations
Source: PLoS Genet. 2011 Jul 21;7(7):e1002170. doi: 10.1371/journal.pgen.1002170 (PMC3140987; doi:10.1371/journal.pgen.1002170)
Supplement: Table S1 — Number of remaining SNPs after applying each quality control criterion. (XLS) [file pgen.1002170.s001.xls]

## Sheet: TableS1
Table S1 Number of remaining SNPs after applying each quality control criterion
	No of SNP remained
Visual inspection by BeadStudio	549224
Excluding SNPs on X, Y or mitochondoria	535638
SNP call rate > 90%	519260
Minor allele frequency > 1%	451405
Hardy Weinburg equilibrium > 0.0001	450326
